# Supplementary material for: High-pressure synthesis and crystal structure analysis of PbTeO4, a UV transparent material
Source: Royal Society of Chemistry journal article supplement (doi:10.1039/d4dt02697g), 2024-01-01
Supplement: d4dt02697g1.pdf [file d4dt02697g1.pdf]

### Electronic Supporting Information

High-pressure synthesis and crystal structure analysis of  $\text{PbTeO}_4$ , a UV transparent material

Michael Hladik,<sup>1</sup> Armin Penz,<sup>1</sup> Felix R. S. Purtscher,<sup>1</sup> Thomas S. Hofer,<sup>1</sup> Gunter Heymann,<sup>1\*</sup>  
Matthias Weil<sup>2\*</sup>

1) Department of General, Inorganic and Theoretical Chemistry  
Universität Innsbruck  
Center for Chemistry and Biomedicine  
Innrain 80-82  
6020 Innsbruck / Austria

2) Institute for Chemical Technologies and Analytics  
Division of Structural Chemistry  
TU Wien  
Getreidemarkt 9/E164-05-1  
1060 Vienna / Austria

## Table of Contents

### Figures

1. Electron micrographs of  $\text{PbTeO}_4$ .
2. Electron micrograph of  $\text{PbTeO}_4$  with selected spots for measurement and corresponding EDX spectra.
3. XRPD measurement (black) of the product obtained after thermal analysis measurement. The red curve corresponds to database entry of tetragonal  $\text{PbTeO}_3$ .
4. Dependence of eigenvalues of the thermal expansion for  $\text{PbTeO}_4$ .
5. Calculated XRPD pattern after energy minimization (red) compared to the data simulated from the experimentally determined single crystal structure (black).

### Tables

1. EDX measurements of  $\text{PbTeO}_4$ . Determined compositions based on selected measurement spots.
2. Comparison of the optimized unit cell parameters obtained for  $\text{PbTeO}_4$  at HSEsol level of theory with the experimentally determined values at 295 K.
3. Optimized atom positions (given in fractional coordinates) of  $\text{PbTeO}_4$  in the  $I2/a$  setting at HSEsol level of theory.
4. Complete list of calculated vibrational modes of  $\text{PbTeO}_4$  at HSEsol level of theory. The associated energy is provided in units of frequency  $\nu$  and the irreducible representation is abbreviated as Irrep. All possible atom pairs are calculated based on their van der Waals radii. The relative motion for each pair of bonded atoms was decomposed into three components: i) stretching vibration (S) along the A-B bond, ii) in-plane angle bending (B) involving a third atom C and iii) out-of-plane angle bending (O) involving a third atom C. The classification of the individual motions is based on a relative contribution greater than 85 % for bond stretching and in-plane angle bending. Collective vibrational motions of entire structural elements are indicated with an R. In any other case, the motion is classified as out-of-plane angle bending. The associated unit cell and respective atom positions in fractional coordinates are given in the  $C2/c$  setting at the end of the Table.

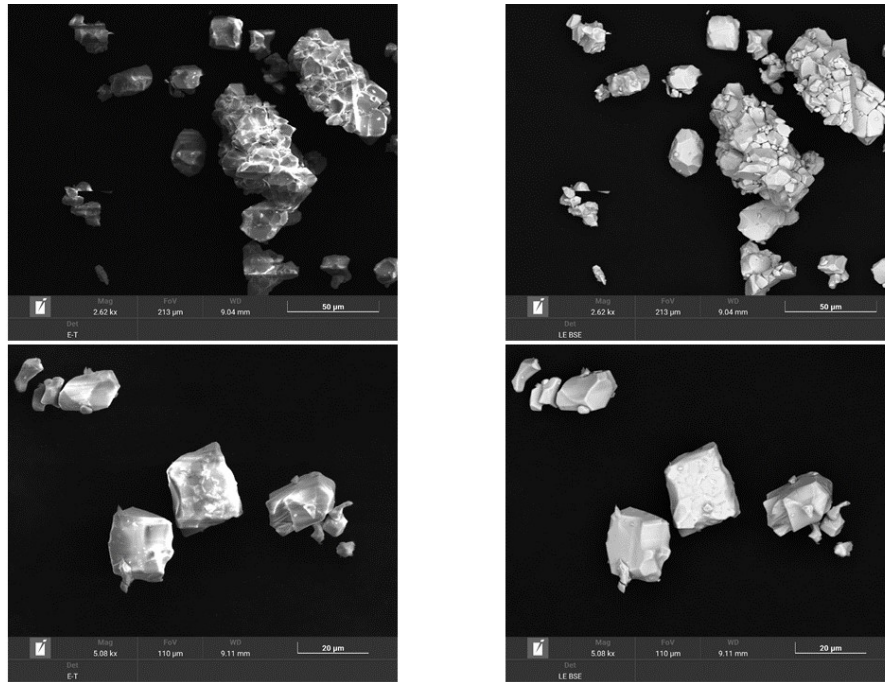

**Fig. S1.** Electron micrographs of  $\text{PbTeO}_4$ .

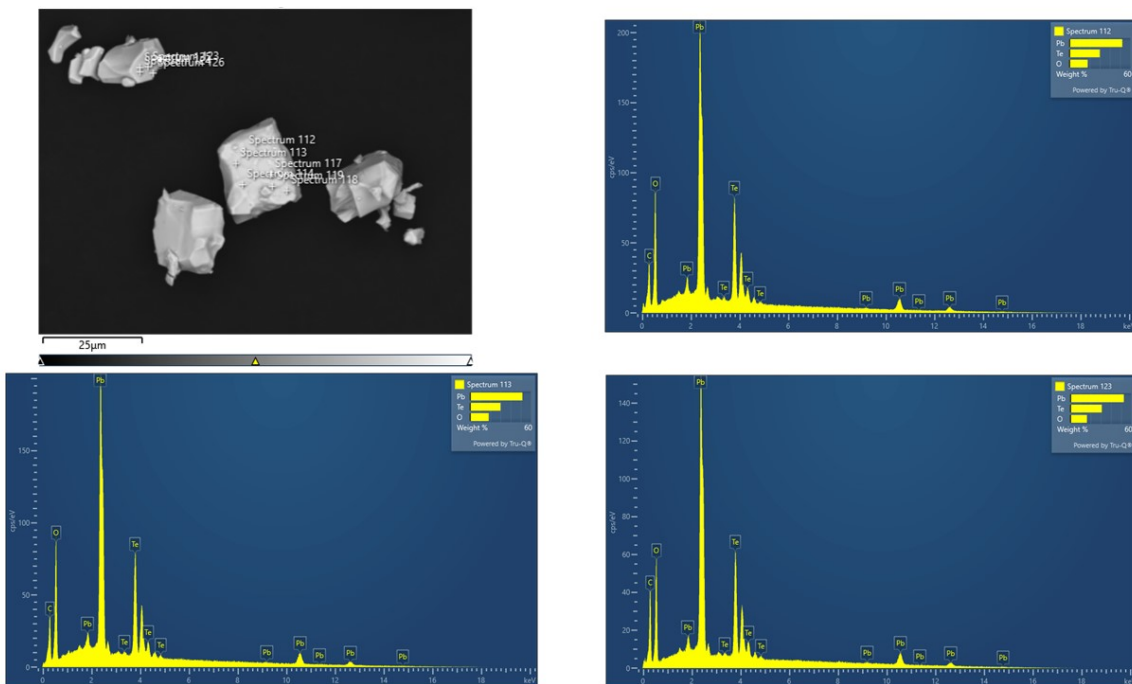

**Fig. S2.** Electron micrograph of  $\text{PbTeO}_4$  with selected spots for measurement and corresponding EDX spectra.

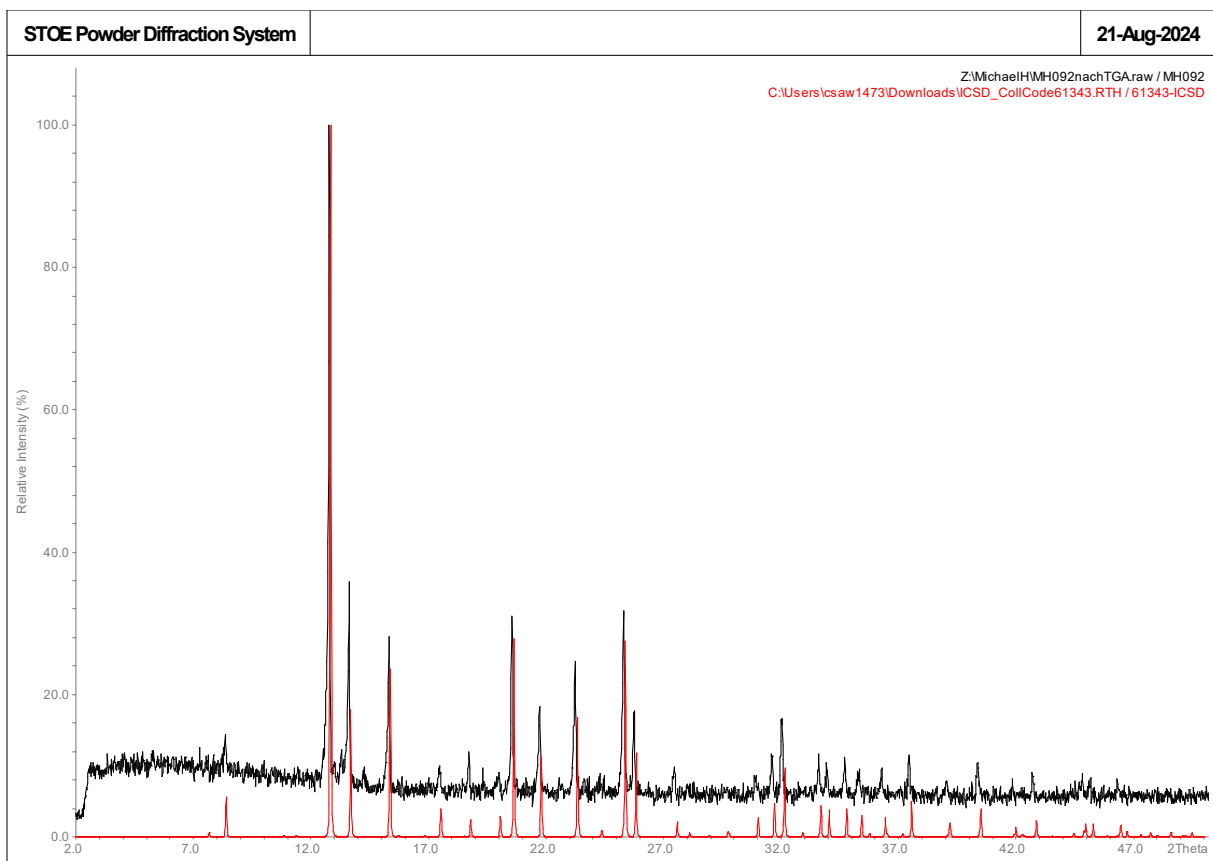

**Fig. S3.** XRPD measurement (black) of the product obtained after thermal analysis measurement. The red curve corresponds to database entry of tetragonal  $\text{PbTeO}_3$ .

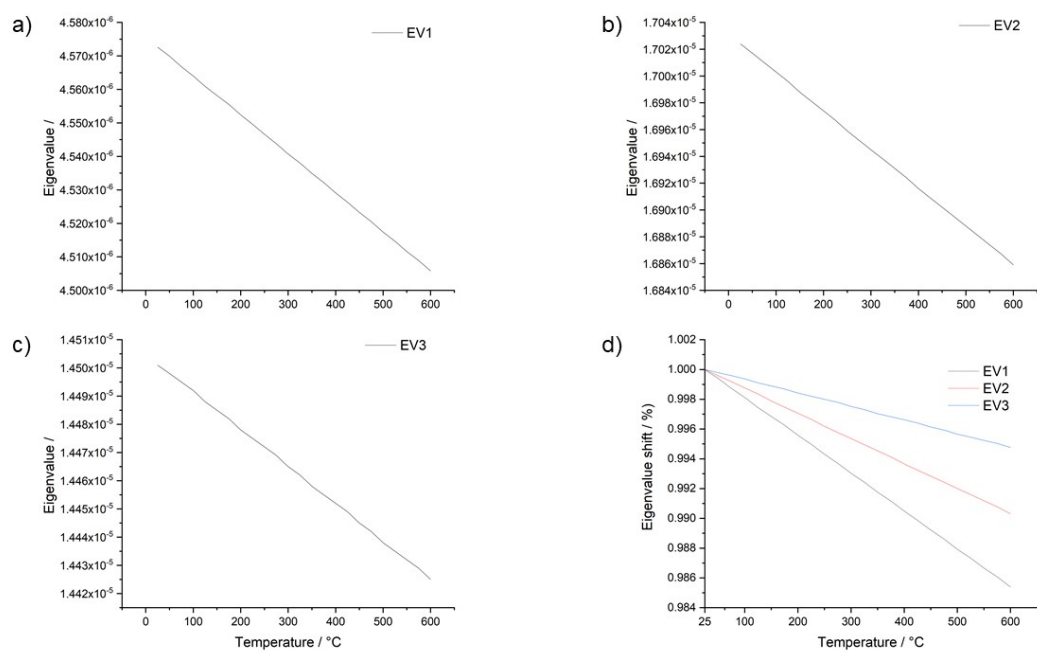

**Fig. S4.** Dependence of eigenvalues of the thermal expansion for  $\text{PbTeO}_4$ .

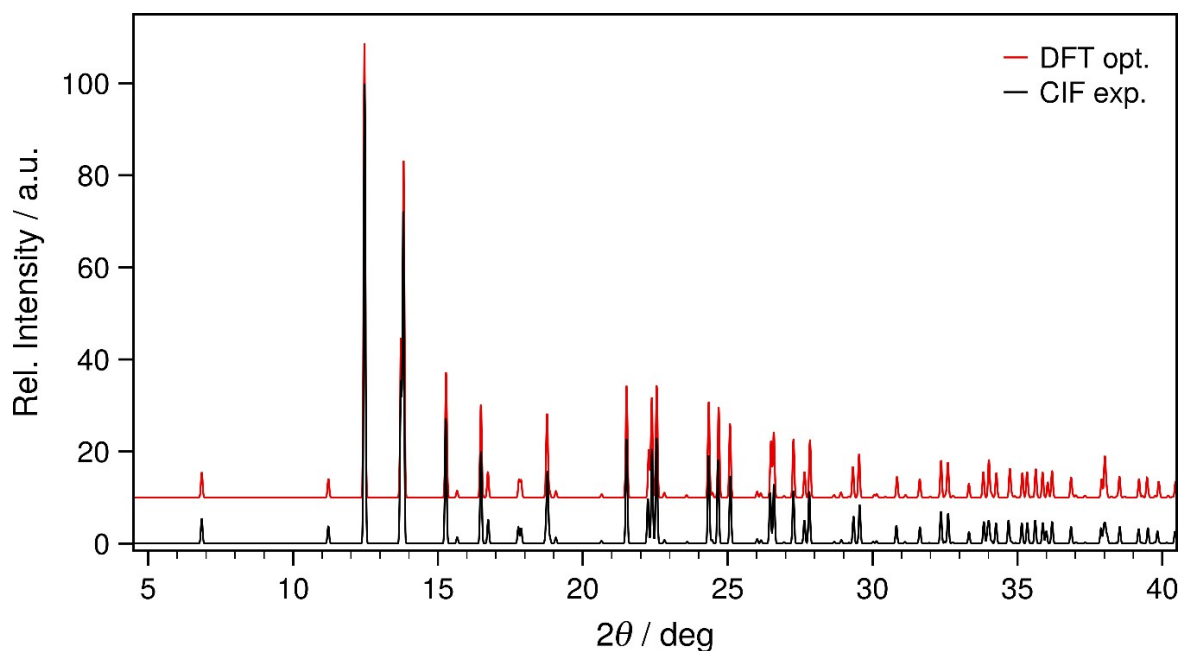

**Fig. S5.** Calculated XRPD pattern after energy minimization (red) compared to the data simulated from the experimentally determined single crystal structure (black).

**Table S1.** EDX measurements of  $\text{PbTeO}_4$ . Determined compositions based on selected measurement spots.

| <b>Spectrum 112</b> | Element | Signal Type | Line     | Wt%    | Wt% Sigma | Atomic % | Standard       |
|---------------------|---------|-------------|----------|--------|-----------|----------|----------------|
|                     | O       | EDS         | K series | 18.01  | 0.23      | 69.86    | $\text{SiO}_2$ |
|                     | Te      | EDS         | L series | 29.89  | 0.24      | 14.54    | HgTe           |
|                     | Pb      | EDS         | M series | 52.10  | 0.29      | 15.61    | PbTe           |
|                     | Total   |             |          | 100.00 |           | 100.00   |                |
| <b>Spectrum 113</b> | Element | Signal Type | Line     | Wt%    | Wt% Sigma | Atomic % | Standard       |
|                     | O       | EDS         | K series | 18.45  | 0.23      | 70.44    | $\text{SiO}_2$ |
|                     | Te      | EDS         | L series | 29.97  | 0.24      | 14.35    | HgTe           |
|                     | Pb      | EDS         | M series | 51.58  | 0.29      | 15.21    | PbTe           |
|                     | Total   |             |          | 100.00 |           | 100.00   |                |
| <b>Spectrum 123</b> | Element | Signal Type | Line     | Wt%    | Wt% Sigma | Atomic % | Standard       |
|                     | O       | EDS         | K series | 16.31  | 0.22      | 67.21    | $\text{SiO}_2$ |
|                     | Te      | EDS         | L series | 31.00  | 0.25      | 16.02    | HgTe           |

|       |     |          |        |        |       |      |
|-------|-----|----------|--------|--------|-------|------|
| Pb    | EDS | M series | 52.70  | 0.29   | 16.77 | PbTe |
| Total |     |          | 100.00 | 100.00 |       |      |

**Table S2.** Comparison of the optimized unit cell parameters obtained for PbTeO<sub>4</sub> at HSEsol level of theory with the experimentally determined values at 295 K.

| Method         | <i>a</i> / Å | <i>b</i> / Å | <i>c</i> / Å | $\beta$ / ° | <i>V</i> / Å <sup>3</sup> |
|----------------|--------------|--------------|--------------|-------------|---------------------------|
| Single-crystal | 5.4142(4)    | 4.9471(4)    | 12.0437(11)  | 99.603(3)   | 318.07(5)                 |
| Powder         | 5.41173(10)  | 4.94608(9)   | 12.0324(2)   | 99.5935(12) | 317.565(10)               |
| HSEsol         | 5.4123       | 4.9476       | 12.045       | 99.721      | 317.91                    |

**Table S3.** Optimized atom positions (given in fractional coordinates) of PbTeO<sub>4</sub> in the *I2/a* setting at HSEsol level of theory.

| Atom | <i>x</i> | <i>y</i> | <i>z</i> |
|------|----------|----------|----------|
| Pb1  | 0.25     | -0.25849 | 0        |
| Te1  | 0.25     | 0.25     | -0.25    |
| O1   | 0.33851  | 0.11365  | -0.10387 |
| O2   | 0.02289  | -0.44769 | 0.19587  |

**Table S4.** Complete list of calculated vibrational modes of PbTeO<sub>4</sub> at HSEsol level of theory. The associated energy is provided in units of frequency  $\nu$  and the irreducible representation is abbreviated as Irrep. All possible atom pairs are calculated based on their van der Waals radii. The relative motion for each pair of bonded atoms was decomposed into three components: i) stretching vibration (S) along the A-B bond, ii) in-plane angle bending (B) involving a third atom C and iii) out-of-plane angle bending (O) involving a third atom C. The classification of the individual motions is based on a relative contribution greater than 85 % for bond stretching and in-plane angle bending. Collective vibrational motions of entire structural elements are indicated with an R. In any other case, the motion is classified as out-of-plane angle bending. The associated unit cell and respective atom positions in fractional coordinates are given in the *C2/c* setting at the end of the Table.

| Mode | $\nu$ / cm <sup>-1</sup> | Irrep                | Type | Atom A | Atom B | Atom C |
|------|--------------------------|----------------------|------|--------|--------|--------|
| 1    | 55.2075                  | <i>B<sub>g</sub></i> | R    | Pb2    | Pb1    | O5     |
|      |                          |                      | R    | Pb2    | Pb1    | O8     |
|      |                          |                      | R    | Pb2    | Pb1    | O6     |
|      |                          |                      | R    | Pb2    | Pb1    | O7     |
| 2    | 61.9618                  | <i>B<sub>u</sub></i> | R    | O5     | Pb1    | Pb2    |
|      |                          |                      | R    | O6     | Pb1    | Pb2    |
|      |                          |                      | R    | O7     | Pb1    | O6     |
|      |                          |                      | R    | O8     | Pb1    | O5     |
|      |                          |                      | R    | O5     | Pb2    | O8     |
|      |                          |                      | R    | O6     | Pb2    | O7     |
|      |                          |                      | R    | O7     | Pb2    | Pb1    |
|      |                          |                      | R    | O8     | Pb2    | Pb1    |
| 3    | 99.9834                  | <i>A<sub>u</sub></i> | R    | O5     | Pb1    | O6     |
|      |                          |                      | R    | O6     | Pb1    | O5     |
|      |                          |                      | R    | O7     | Pb1    | O8     |
|      |                          |                      | R    | O8     | Pb1    | O7     |

|    |          |       |   |     |     |     |
|----|----------|-------|---|-----|-----|-----|
|    |          |       | R | O5  | Pb2 | O6  |
|    |          |       | R | O6  | Pb2 | O5  |
|    |          |       | R | O7  | Pb2 | O8  |
|    |          |       | R | O8  | Pb2 | O7  |
| 4  | 101.689  | $B_g$ | S | Pb2 | Pb1 | Pb2 |
|    |          |       | S | Pb2 | Pb1 | Pb2 |
|    |          |       | S | Pb2 | Pb1 | Pb2 |
|    |          |       | S | Pb2 | Pb1 | Pb2 |
| 5  | 111.5628 | $A_g$ | B | Pb2 | Pb1 | Pb2 |
|    |          |       | B | Pb2 | Pb1 | Pb2 |
|    |          |       | B | Pb2 | Pb1 | Pb2 |
|    |          |       | B | Pb2 | Pb1 | Pb2 |
| 6  | 121.1118 | $B_u$ | B | Pb1 | O5  | Te3 |
|    |          |       | B | Pb1 | O6  | Te4 |
|    |          |       | O | Pb1 | O7  | Te3 |
|    |          |       | O | Pb1 | O8  | Te4 |
|    |          |       | O | Pb2 | O5  | Te3 |
|    |          |       | O | Pb2 | O6  | Te4 |
|    |          |       | B | Pb2 | O7  | Te3 |
|    |          |       | B | Pb2 | O8  | Te4 |
| 7  | 155.4987 | $A_g$ | B | O9  | Te3 | O12 |
|    |          |       | O | O10 | Te3 | O9  |
|    |          |       | B | O11 | Te3 | O12 |
|    |          |       | O | O12 | Te3 | O9  |
|    |          |       | O | O9  | Te4 | O10 |
|    |          |       | B | O10 | Te4 | O9  |
|    |          |       | O | O11 | Te4 | O10 |
|    |          |       | B | O12 | Te4 | O9  |
| 8  | 195.4488 | $A_u$ | B | Te3 | O10 | Te4 |
|    |          |       | B | Te3 | O12 | Te4 |
|    |          |       | B | Te4 | O9  | Te3 |
|    |          |       | B | Te4 | O11 | Te3 |
| 9  | 206.1675 | $B_u$ | B | O5  | Pb1 | Pb2 |
|    |          |       | B | O6  | Pb1 | Pb2 |
|    |          |       | B | O7  | Pb1 | O6  |
|    |          |       | B | O8  | Pb1 | O5  |
|    |          |       | B | O5  | Pb2 | O8  |
|    |          |       | B | O6  | Pb2 | O7  |
|    |          |       | B | O7  | Pb2 | Pb1 |
|    |          |       | B | O8  | Pb2 | Pb1 |
|    |          |       | B | O5  | Te3 | O9  |
|    |          |       | B | O7  | Te3 | O9  |
|    |          |       | B | O6  | Te4 | O12 |
|    |          |       | B | O8  | Te4 | O10 |
| 10 | 218.7505 | $A_g$ | B | O5  | Pb1 | Pb2 |
|    |          |       | B | O6  | Pb1 | Pb2 |
|    |          |       | B | O7  | Pb1 | O6  |
|    |          |       | B | O8  | Pb1 | O5  |
|    |          |       | B | O5  | Pb2 | O8  |

|    |          |       |   |     |     |     |
|----|----------|-------|---|-----|-----|-----|
|    |          |       | B | 06  | Pb2 | 07  |
|    |          |       | B | 07  | Pb2 | Pb1 |
|    |          |       | B | 08  | Pb2 | Pb1 |
|    |          |       | B | 05  | Te3 | 09  |
|    |          |       | B | 07  | Te3 | 09  |
|    |          |       | B | 06  | Te4 | O12 |
|    |          |       | B | 08  | Te4 | O12 |
| 11 | 245.6428 | $B_g$ | B | 05  | Pb1 | 06  |
|    |          |       | B | 06  | Pb1 | 05  |
|    |          |       | B | 07  | Pb1 | 06  |
|    |          |       | B | 08  | Pb1 | 05  |
|    |          |       | B | 05  | Pb2 | 08  |
|    |          |       | B | 06  | Pb2 | 07  |
|    |          |       | B | 07  | Pb2 | 08  |
|    |          |       | B | 08  | Pb2 | 07  |
|    |          |       | B | 05  | Te3 | 09  |
|    |          |       | B | 07  | Te3 | 09  |
|    |          |       | B | 06  | Te4 | O12 |
|    |          |       | B | 08  | Te4 | O12 |
| 12 | 247.8098 | $A_u$ | O | 05  | Te3 | 09  |
|    |          |       | O | 07  | Te3 | 09  |
|    |          |       | B | 09  | Te3 | O12 |
|    |          |       | B | O11 | Te3 | O12 |
|    |          |       | O | 06  | Te4 | O12 |
|    |          |       | O | 08  | Te4 | O12 |
|    |          |       | B | O10 | Te4 | 09  |
|    |          |       | B | O12 | Te4 | 09  |
| 13 | 254.6722 | $B_u$ | B | 09  | Te3 | O12 |
|    |          |       | B | O11 | Te3 | O12 |
|    |          |       | B | O10 | Te4 | 09  |
|    |          |       | B | O12 | Te4 | 09  |
| 14 | 273.4607 | $A_u$ | O | O10 | Te3 | 09  |
|    |          |       | O | O12 | Te3 | 09  |
|    |          |       | O | 09  | Te4 | O10 |
|    |          |       | O | O11 | Te4 | O10 |
| 15 | 286.2286 | $B_g$ | O | 09  | Te3 | O12 |
|    |          |       | B | O10 | Te3 | 05  |
|    |          |       | O | O11 | Te3 | O12 |
|    |          |       | B | O12 | Te3 | 05  |
|    |          |       | B | 09  | Te4 | 06  |
|    |          |       | O | O10 | Te4 | 09  |
|    |          |       | B | O11 | Te4 | 06  |
|    |          |       | O | O12 | Te4 | 09  |
| 16 | 293.9963 | $A_u$ | O | 05  | Te3 | 09  |
|    |          |       | O | 07  | Te3 | 09  |
|    |          |       | B | 09  | Te3 | O12 |
|    |          |       | B | O10 | Te3 | 05  |
|    |          |       | B | O11 | Te3 | O12 |
|    |          |       | B | O12 | Te3 | 05  |



|    |          |       |   |     |     |     |
|----|----------|-------|---|-----|-----|-----|
|    |          |       | O | O6  | Te4 | O12 |
|    |          |       | O | O8  | Te4 | O12 |
|    |          |       | B | O9  | Te4 | O6  |
|    |          |       | B | O10 | Te4 | O9  |
|    |          |       | B | O11 | Te4 | O6  |
|    |          |       | B | O12 | Te4 | O9  |
| 17 | 294.404  | $B_u$ | O | O10 | Te3 | O9  |
|    |          |       | O | O12 | Te3 | O9  |
|    |          |       | O | O9  | Te4 | O10 |
|    |          |       | O | O11 | Te4 | O10 |
| 18 | 354.3651 | $A_g$ | B | O5  | Pb1 | Pb2 |
|    |          |       | B | O6  | Pb1 | Pb2 |
|    |          |       | S | O7  | Pb1 |     |
|    |          |       | S | O8  | Pb1 |     |
|    |          |       | S | O5  | Pb2 |     |
|    |          |       | S | O6  | Pb2 |     |
|    |          |       | B | O7  | Pb2 | Pb1 |
|    |          |       | B | O8  | Pb2 | Pb1 |
|    |          |       | B | Te3 | O5  | Pb2 |
|    |          |       | B | Te3 | O7  | Pb1 |
|    |          |       | B | Te4 | O6  | Pb2 |
|    |          |       | B | Te4 | O8  | Pb1 |
| 19 | 355.6528 | $B_u$ | B | Te3 | O5  | Pb1 |
|    |          |       | B | Te3 | O7  | Pb2 |
|    |          |       | B | Te4 | O6  | Pb1 |
|    |          |       | B | Te4 | O8  | Pb2 |
| 20 | 399.3387 | $B_g$ | B | O9  | Te3 | O12 |
|    |          |       | O | O10 | Te3 | O9  |
|    |          |       | B | O11 | Te3 | O12 |
|    |          |       | O | O12 | Te3 | O9  |
|    |          |       | O | O9  | Te4 | O10 |
|    |          |       | B | O10 | Te4 | O9  |
|    |          |       | O | O11 | Te4 | O10 |
|    |          |       | B | O12 | Te4 | O9  |
| 21 | 423.2132 | $A_u$ | B | Te3 | O9  | Te4 |
|    |          |       | B | Te3 | O11 | Te4 |
|    |          |       | B | Te4 | O10 | Te3 |
|    |          |       | B | Te4 | O12 | Te3 |
| 22 | 436.9384 | $A_g$ | B | O9  | Te3 | O5  |
|    |          |       | B | O10 | Te3 | O5  |
|    |          |       | B | O11 | Te3 | O5  |
|    |          |       | B | O12 | Te3 | O5  |
|    |          |       | B | O9  | Te4 | O6  |
|    |          |       | B | O10 | Te4 | O6  |
|    |          |       | B | O11 | Te4 | O6  |
|    |          |       | B | O12 | Te4 | O8  |
| 23 | 450.7137 | $A_u$ | B | Te3 | O5  | Pb2 |
|    |          |       | B | Te3 | O7  | Pb1 |
|    |          |       | B | Te4 | O6  | Pb2 |

|    |          |       |   |     |     |     |
|----|----------|-------|---|-----|-----|-----|
|    |          |       | B | Te4 | O8  | Pb1 |
| 24 | 461.7121 | $B_g$ | B | Te3 | O9  | Te4 |
|    |          |       | B | Te3 | O10 | Te4 |
|    |          |       | B | Te3 | O11 | Te4 |
|    |          |       | B | Te3 | O12 | Te4 |
|    |          |       | B | Te4 | O9  | Te3 |
|    |          |       | B | Te4 | O10 | Te3 |
|    |          |       | B | Te4 | O11 | Te3 |
|    |          |       | B | Te4 | O12 | Te3 |
| 25 | 468.5529 | $B_u$ | B | O9  | Te3 | O5  |
|    |          |       | B | Te3 | O10 | Te4 |
|    |          |       | B | O11 | Te3 | O5  |
|    |          |       | B | Te3 | O12 | Te4 |
|    |          |       | B | Te4 | O9  | Te3 |
|    |          |       | B | O10 | Te4 | O6  |
|    |          |       | B | Te4 | O11 | Te3 |
|    |          |       | B | O12 | Te4 | O8  |
| 26 | 598.1403 | $B_g$ | S | Pb1 | O5  | Te3 |
|    |          |       | S | Pb1 | O6  | Te4 |
|    |          |       | B | Pb1 | O7  | Te3 |
|    |          |       | B | Pb1 | O8  | Te4 |
|    |          |       | B | Pb2 | O5  | Te3 |
|    |          |       | B | Pb2 | O6  | Te4 |
|    |          |       | S | Pb2 | O7  | Te3 |
|    |          |       | S | Pb2 | O8  | Te4 |
|    |          |       | S | O5  | Te3 |     |
|    |          |       | S | O7  | Te3 |     |
|    |          |       | S | O6  | Te4 |     |
|    |          |       | S | O8  | Te4 |     |
| 27 | 613.4356 | $A_g$ | S | O9  | Te3 |     |
|    |          |       | S | Te3 | O10 | Te4 |
|    |          |       | S | O11 | Te3 |     |
|    |          |       | S | Te3 | O12 | Te4 |
|    |          |       | S | Te4 | O9  | Te3 |
|    |          |       | S | O10 | Te4 |     |
|    |          |       | S | Te4 | O11 | Te3 |
|    |          |       | S | O12 | Te4 |     |
| 28 | 658.6918 | $B_u$ | S | Te3 | O9  | Te4 |
|    |          |       | S | O10 | Te3 |     |
|    |          |       | S | Te3 | O11 | Te4 |
|    |          |       | S | O12 | Te3 |     |
|    |          |       | S | O9  | Te4 |     |
|    |          |       | S | Te4 | O10 | Te3 |
|    |          |       | S | O11 | Te4 |     |
|    |          |       | S | Te4 | O12 | Te3 |
| 29 | 674.588  | $A_u$ | S | O9  | Te3 |     |
|    |          |       | S | Te3 | O10 | Te4 |
|    |          |       | S | O11 | Te3 |     |
|    |          |       | S | Te3 | O12 | Te4 |

|    |          |       |   |     |     |     |
|----|----------|-------|---|-----|-----|-----|
|    |          |       | S | Te4 | O9  | Te3 |
|    |          |       | S | O10 | Te4 |     |
|    |          |       | S | Te4 | O11 | Te3 |
|    |          |       | S | O12 | Te4 |     |
| 30 | 716.7821 | $B_u$ | S | O5  | Te3 |     |
|    |          |       | S | O7  | Te3 |     |
|    |          |       | S | O6  | Te4 |     |
|    |          |       | S | O8  | Te4 |     |
| 31 | 738.2594 | $A_u$ | S | O5  | Te3 |     |
|    |          |       | S | O7  | Te3 |     |
|    |          |       | S | O6  | Te4 |     |
|    |          |       | S | O8  | Te4 |     |
| 32 | 740.8657 | $A_g$ | S | Pb1 | O5  | Te3 |
|    |          |       | S | Pb1 | O6  | Te4 |
|    |          |       | B | Pb1 | O7  | Te3 |
|    |          |       | B | Pb1 | O8  | Te4 |
|    |          |       | B | Pb2 | O5  | Te3 |
|    |          |       | B | Pb2 | O6  | Te4 |
|    |          |       | S | Pb2 | O7  | Te3 |
|    |          |       | S | Pb2 | O8  | Te4 |
|    |          |       | S | O5  | Te3 |     |
|    |          |       | S | O7  | Te3 |     |
|    |          |       | S | O6  | Te4 |     |
|    |          |       | S | O8  | Te4 |     |
| 33 | 782.3425 | $B_g$ | S | O9  | Te3 |     |
|    |          |       | S | Te3 | O10 | Te4 |
|    |          |       | S | O11 | Te3 |     |
|    |          |       | S | Te3 | O12 | Te4 |
|    |          |       | S | Te4 | O9  | Te3 |
|    |          |       | S | O10 | Te4 |     |
|    |          |       | S | Te4 | O11 | Te3 |
|    |          |       | S | O12 | Te4 |     |

|            |                  |                  |                  |                  |                    |
|------------|------------------|------------------|------------------|------------------|--------------------|
| Unit Cell: | $a / \text{\AA}$ | $b / \text{\AA}$ | $c / \text{\AA}$ | $\beta / ^\circ$ | $V / \text{\AA}^3$ |
|            | 12.3435          | 4.9476           | 5.4123           | 105.89           | 317.911            |

| Atom (Index) | x        | y        | z        |
|--------------|----------|----------|----------|
| Pb1(1)       | 0.25849  | 0.25849  | 0.25000  |
| Pb(1)        | -0.25849 | -0.25849 | -0.25000 |
| Te1(1)       | -0.50000 | 0.00000  | 0.00000  |
| Te2(1)       | 0.00000  | -0.50000 | 0.50000  |
| O1(1)        | -0.21752 | -0.00978 | 0.05762  |
| O2(1)        | -0.00978 | -0.21752 | 0.44238  |
| O3(1)        | 0.21752  | 0.00978  | -0.05762 |
| O4(1)        | 0.00978  | 0.21752  | -0.44238 |
| O5(2)        | 0.35645  | -0.25183 | 0.32702  |

|       |          |          |          |
|-------|----------|----------|----------|
| O6(2) | -0.25183 | 0.35645  | 0.17298  |
| O7(2) | -0.35645 | 0.25183  | -0.32702 |
| O8(2) | 0.25183  | -0.35645 | -0.17298 |
